# Supplementary material
Source: Springer Nature journal article supplement (https://www.springermedizin.de/resource/supplementary/13018_2010_277_MOESM9_ESM.pdf/9636684)

### Single Ring - Shear Loading

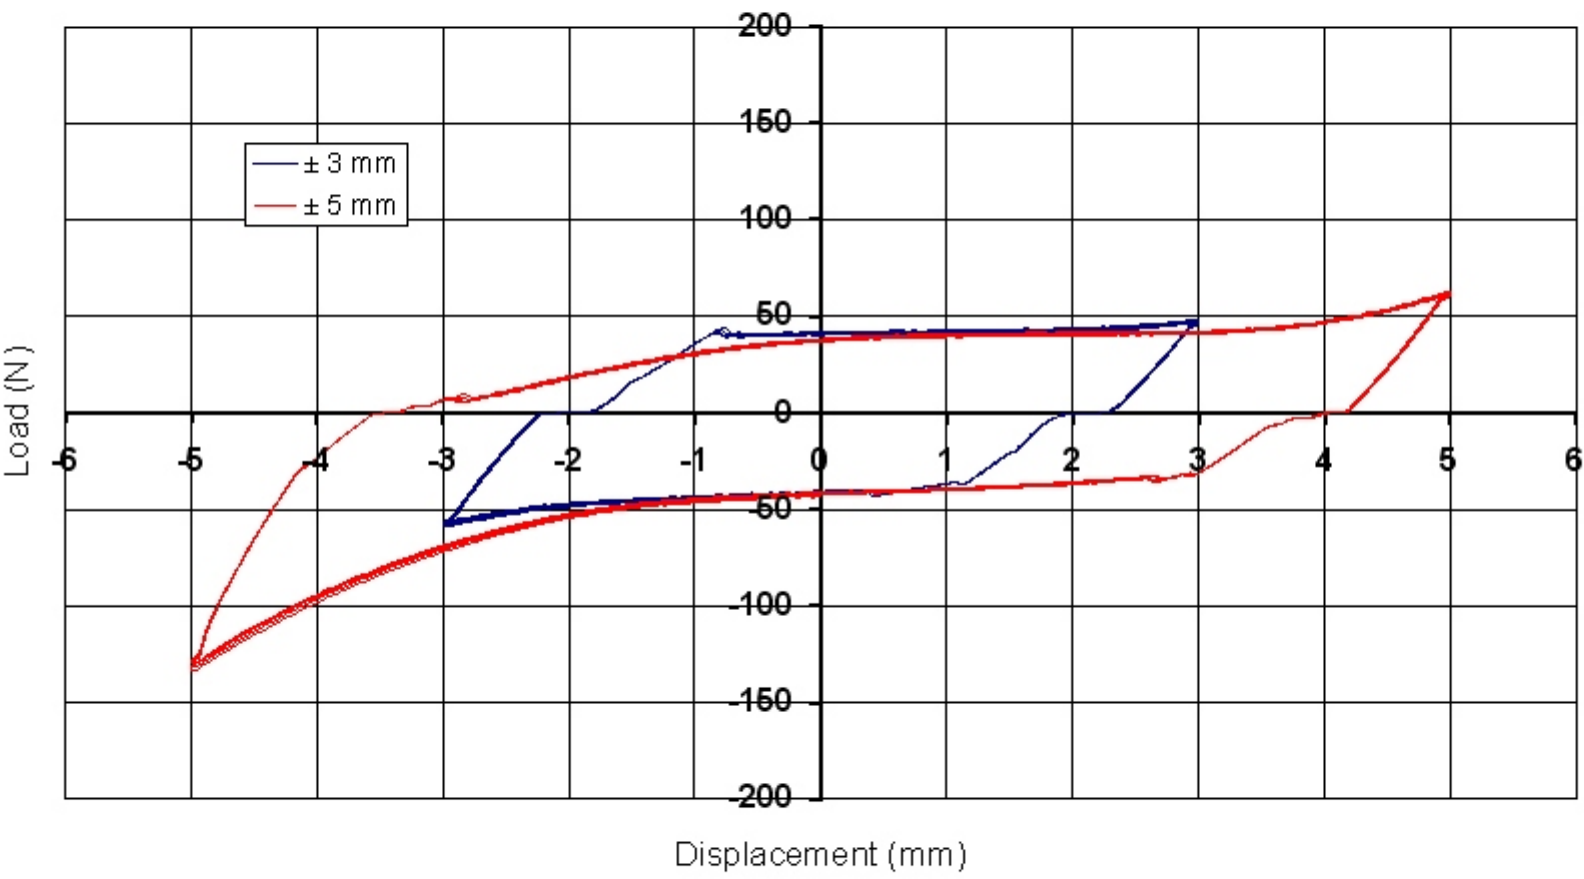

Supplement: MOESM9 [file 9636684]
